# Pan-cancer characterisation of microRNA with hallmarks of cancer reveals role of microRNA-mediated downregulation of tumour suppressor genes

Andrew Dhawan<sup>1</sup>, Jacob G. Scott<sup>2</sup>, Adrian L. Harris<sup>1</sup>, and Francesca M. Buffa<sup>1\*</sup>

1 Department of Oncology, University of Oxford, Oxford, United Kingdom

2 Translational Hematology and Radiology, Cleveland Clinic, Cleveland, United States

\* [francesca.buffa@oncology.ox.ac.uk](mailto:francesca.buffa@oncology.ox.ac.uk)

microRNA are key regulators of the human transcriptome across a number of diverse biological processes, such as development, aging, and cancer, where particular miRNA have been identified as tumour suppressive and oncogenic. In this work, we sought to elucidate, in a comprehensive manner, across 15 epithelial cancer types comprising 7,316 clinical samples from the Cancer Genome Atlas, the association of miRNA expression and target regulation with the phenotypic hallmarks of cancer. Utilising penalized regression techniques to integrate transcriptomic, methylation and mutation data, we find evidence for a complex map of interactions underlying the relationship of miRNA regulation and the hallmarks of cancer. This highlighted high redundancy for the oncomiR-1 cluster of oncogenic miRNAs, in particular hsa-miR-17-5p. In addition, we reveal extensive miRNA regulation of tumour suppressor genes such as PTEN, FAT4, and CDK12, uncovering an alternative mechanism of repression in the absence of mutation, methylation or copy number changes.

1 The hallmarks of cancer very clearly outline the  
2 major phenotypic changes underlying the oncogenic  
3 process [24, 25]. These changes characterise cancer  
4 as a disease, and may define actionable targets  
5 for therapeutic intervention. Since the definition of  
6 these characteristic hallmarks in 2001 [24], and the  
7 subsequent ‘genomic revolution’ that has occurred  
8 in the field of cancer biology, multiple groups have  
9 proposed gene expression signatures as biomarkers  
10 of these phenotypic hallmarks [26, 47, 53]. These  
11 gene signatures generally consist of a set of tens to  
12 several hundred coding genes, for which a summary

metric of their collective expression is associated  
13 with a known hallmark, and may help with defining  
14 therapeutic strategies [3]. Encapsulated within this  
15 methodology and these signatures is a vast amount  
16 of biological discovery for particular genes impli-  
17 cated in the development and progression of these  
18 hallmarks. However, since the more recent publica-  
19 tion of the updated hallmarks in 2011 [25], there has  
20 been a second revolution in the field of genomics;  
21 namely, the discovery of the diverse, critical roles of  
22 non-coding RNAs in cancer. 23

Previously thought to be ‘junk DNA,’ non-  
24 coding RNA are those RNA derived from DNA  
25 that do not code for proteins, and consists of a di-  
26 verse family of evolutionarily conserved species, in-  
27 cluding long non-coding RNA (lncRNA), circular  
28 RNA (circRNA), and microRNA (miRNA), among  
29 others [23, 40, 41]. Much effort has focused on  
30 the characterisation of these non-coding RNA, and  
31 early work has shown that these species, particularly  
32 miRNA, are involved in a number of cellular de-  
33 velopmental, and differentiation processes [50]. In  
34 addition, miRNA have been implicated in a num-  
35 ber of human diseases, ranging from diabetes to  
36 cancer, and in oncology, recent work has led to  
37 the discovery of tumour-suppressive and oncogenic  
38 miRNA [7, 42, 44, 49]. miRNA exert their function  
39 within the cell primarily as repressors of protein  
40 production, functioning as post-transcriptional reg-  
41 ulators of mRNA, inhibiting translation or encour-  
42 aging transcript degradation. miRNA exert their  
43 effects by complementary base-pair binding to a  
44 short 7-8 nucleotide ‘seed region’ typically located  
45 on the 3’ untranslated region of the messenger RNA  
46 which they inhibit [40]. A single miRNA is thought  
47

48 to able to exert its repressive effects on hundreds  
49 to thousands of transcripts, meaning that specific  
50 miRNA may have very wide-ranging and fast-acting  
51 effects on cellular phenotype [40]. Despite this po-  
52 tential, due to the highly variable effect on the single  
53 target transcripts and the many factors involved in  
54 post-transcriptional gene regulation in addition to  
55 miRNA, the repressive signal on their targets, both  
56 validated targets and predicted targets by sequence  
57 complementarity, remains challenging to detect in  
58 clinical datasets [6]. As a result, behavioural char-  
59 acterisation of miRNA has been progressing at a slow  
60 rate, with studies focusing on changes induced by a  
61 single miRNA or small families of miRNA, without  
62 any efforts for large-scale characterisation.

63 A further complicating factor with respect to the  
64 study of miRNAs is the relative promiscuity of their  
65 targets [36]. A given miRNA may have thousands  
66 of targets, with many experimentally verified, but  
67 often these targets possess significant differences in  
68 function [54]. This has led to an almost paradoxi-  
69 cal finding about the effects of miRNAs, in that a  
70 single miRNA may theoretically exert effects in op-  
71 posing directions within the cell [54]. This paradox  
72 is resolved by the observation that miRNA likely  
73 play different roles depending on the environment in  
74 which they are expressed [10, 20, 36]. Therefore, in  
75 addition to the challenge of measuring the repressive  
76 effect of miRNAs within a transcriptome, the effect  
77 of a miRNA on a transcriptome may vary massively,  
78 depending on the relative abundance of each of its tar-  
79 gets. That is, a miRNA may only repress targets to  
80 which it is able to bind, and this requires the presence  
81 of the target in a detectable concentration compared  
82 to all others [14]. This means that the effect of a  
83 miRNA on phenotype can only be observed in sam-  
84 ples for which the transcriptomes are comparable in  
85 the expression of the key targets in consideration,  
86 and such effects are highly context-dependent.

87 In this work, we show how this context-  
88 dependent action can be exploited to gain high confi-  
89 dence predictions uncovering known and unknown  
90 associations with miRNA and phenotype. Through  
91 the classification of tumour transcriptomes by gene  
92 expression signatures, we uncover the diverse roles  
93 of miRNAs in regulating the hallmarks of cancer.

94 Our results point towards a scenario wherein the  
95 transcriptome of the cancer cell, known to be driven  
96 by dysregulation of tumour suppressor genes and  
97 oncogenes, is heavily regulated by miRNAs. We  
98 show that predicted miRNA-target associations that  
99 retain significance across multiple cancer types in-  
100 volve a number of critical tumour suppressor genes  
101 and oncogenes. Study of these tumour suppressor  
102 genes yields novel conclusions about their regula-  
103 tion, particularly with respect to their repression by  
104 miRNA, methylation and mutation, and the exclu-  
105 sivity of the occurrence of these modes of regulation  
106 across human cancers.

## 107 Results

### 108 Evaluation of Hallmark gene signatures 109 across cancers

110 The first prerequisite to our study was to identify  
111 suitable biomarkers to infer cancer phenotype. In or-  
112 der to achieve this, we chose 24 previously identified  
113 gene expression signatures (Supplementary S1) that  
114 have already been shown to be representative for a  
115 wide number of samples, and a number of fundamen-  
116 tal phenotypic properties, with the hopes of alleviat-  
117 ing issues related to highly tissue-specific expression  
118 patterns. With this in mind, we applied *sigQC*, an  
119 R package encapsulating a robust methodology for  
120 the evaluation of gene signatures on various datasets  
121 for the basic statistical properties underlying their  
122 applicability [16]. We ran this package on all combi-  
123 nations of 15 datasets and 24 signatures considered  
124 in this study, and tested the consistency of signature  
125 performance across cancer types, giving confidence  
126 in the application of the signatures to these datasets.  
127 All summary plots from the *sigQC* quality control  
128 protocol are presented in Supplementary Section S2.  
129 Each of the signatures considered over the 15 epithe-  
130 lial cancer datasets showed good applicability, strong  
131 signature gene expression, moderate-strong compact-  
132 ness, and good gene signature score variability, as  
133 well as strong autocorrelation of signature metrics.  
134 The previous validation of these signatures, and our  
135 study-specific quality control results, justify our sub-  
136 sequent use of these signatures in a pan-cancer man-

137 ner, to identify conserved associations of miRNA  
138 and signature gene expression across tissue types.

### 139 **Hallmark gene signatures association analy-** 140 **sis reveals a complex pan-cancer miRNA reg-** 141 **ulatory network**

142 To determine the association of gene signatures to  
143 miRNA expression, we set the signature score (see  
144 Online Methods) for each signature equal to a linear  
145 model consisting of all miRNAs showing at least  
146 moderate univariate predictive ability for the signa-  
147 ture summary score, as depicted in Figure 1a. Mul-  
148 tivariale linear modelling with L1/L2 penalized  
149 regression optimized by cross-validation was used  
150 as previously described [6] to identify the miRNAs  
151 which showed the greatest predictive ability for each  
152 hallmark signature score across the cancer types con-  
153 sidered, thereby identifying those miRNA common  
154 to the gene signature across tumour types (see On-  
155 line Methods). An example of the values for miRNA  
156 coefficients across cancer types following the model  
157 fitting is depicted in Figure 1b. miRNAs were then  
158 ranked based on their final model coefficient (reflec-  
159 tive of the strength of association to the signature),  
160 and miRNAs consistently ranking highly as posi-  
161 tive predictors of a given hallmark signature across  
162 cancer types were aggregated, from which statisti-  
163 cally significant miRNAs were isolated with the rank  
164 product test (signature-associated miRNAs). Like-  
165 wise, for each gene signature, the miRNAs most  
166 consistently ranked as strong negative predictors of  
167 signature score across cancer types were aggregated  
168 by a rank-based methodology (negatively signature-  
169 associated miRNA), as depicted in Figure 1c. This  
170 analysis reveals both many known and unknown  
171 significant associations between miRNA and gene  
172 signature scores, facilitating an understanding of the  
173 miRNA involved with hallmark phenotypes, provid-  
174 ing both novel hypotheses, and adding to evidence  
175 for existing ones.

176 To verify the validity of these predictions, we  
177 considered the example case of miRNAs found to  
178 associate significantly with the hypoxia signatures  
179 considered. Hypoxia is one of the most studied mi-  
180 croenvironmental perturbations in the context of

miRNA regulation, and one with a very well-defined  
181 pathway, controlled largely by a single transcrip-  
182 tion factor, HIF-1 $\alpha$  [48]. Taking the intersection  
183 of the sets of miRNAs found to associate positively  
184 with the two previously validated hypoxia gene sig-  
185 natures (Hypoxia, Buffa et al. [5], and Hypoxia,  
186 MSigDb [34]), we obtained high confidence predic-  
187 tions for hypoxia-associated miRNAs. 188

As shown in the Tables associated with Supple-  
189 mentary S3, this analysis reveals that many of the  
190 miRNAs found to be commonly associated with  
191 both hypoxia gene signatures have been previously  
192 identified as hypoxia regulated. High confidence  
193 predictions are made for: hsa-miR-210-3p [8], -21-  
194 3p, -21-5p, -23a-5p, -23a-3p, -24-3p, -24-2-5p, -27a-  
195 5p, [31], let-7e-5p, let-7e-3p [11], -22-5p, -22-3p [57].  
196 This analysis also suggests significant, pan-cancer,  
197 potential roles for other members of the let-7 family  
198 of miRNAs in hypoxia; namely, let-7b-5p, let-7b-3p,  
199 let-7d-5p, let-7d-3p, as well as hsa-miR-223-3p, -18a-  
200 5p, and -28-3p, which have potentially escaped the  
201 notice of other approaches. 202

In the context of all gene signatures considered,  
203 we identify a global underlying ‘map’ connecting  
204 each miRNA to each gene signature with which we  
205 have found an association. As shown in Figure 1d,  
206 this is a highly interconnected and complex network,  
207 with the conservation of a core set of miRNAs shared  
208 across the hallmarks of cancer. A similar analysis re-  
209 veals an analogous result for the miRNA-hallmarks  
210 network for the miRNA negatively associated with  
211 both signatures, as described in Supplementary Sec-  
212 tion S4. To validate the reproducibility of these re-  
213 sults, we rebuilt the signature-miRNA linear model  
214 using a large independent dataset, the Metabrc breast  
215 cancer cohort [13]. The miRNA identified as posi-  
216 tively and negatively associated with gene signatures  
217 in this dataset show highly significant concordance  
218 over a majority of signatures with the correspond-  
219 ing miRNAs identified from analysis of the TCGA  
220 dataset (Supplementary Figure ??, Section S5). 221

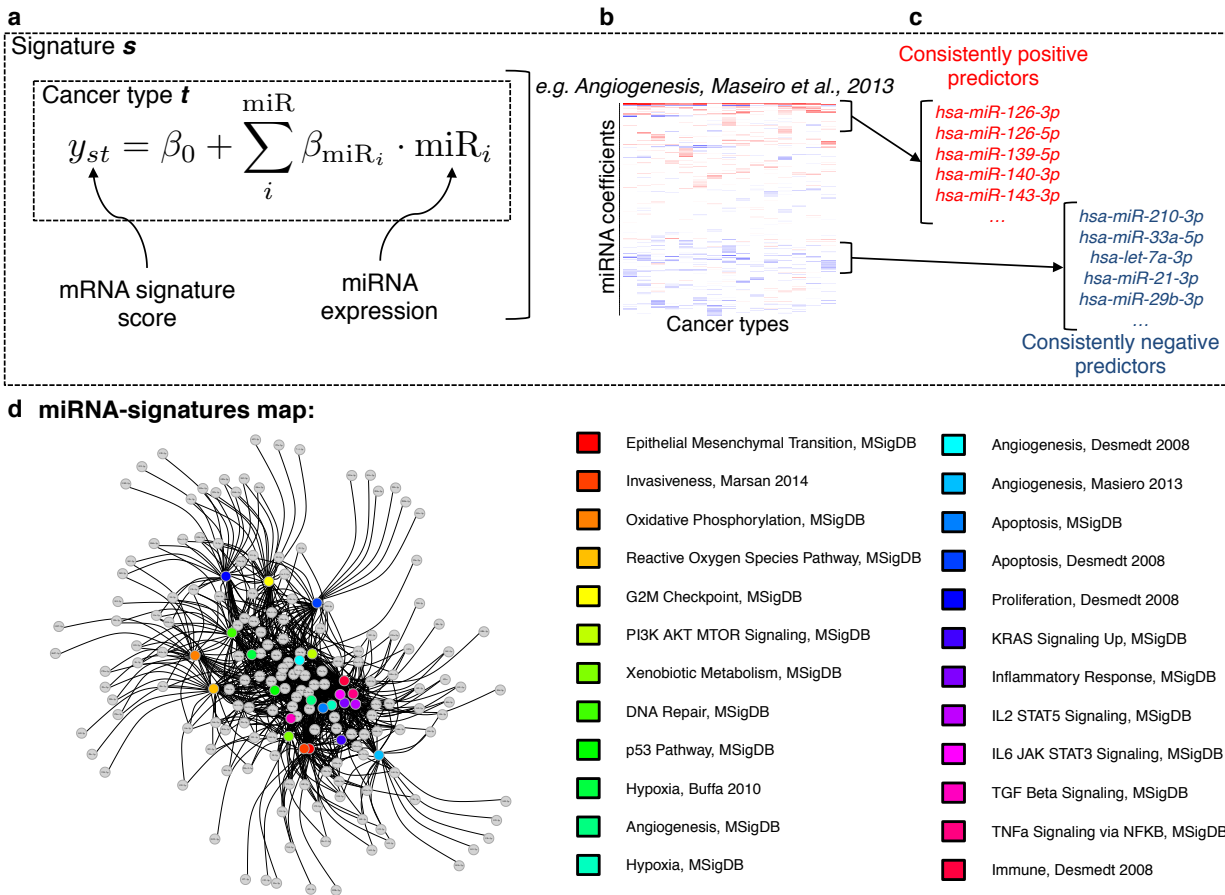

**Figure 1.** Overview of approach used to identify hallmarks-associated miRNA. (a) Overview of the linear model used in the fitting, for each gene signature and cancer type under consideration. (b) Example of a heatmap depicting the values of the coefficients identified for the miRNA predictors (rows), across cancer types (columns) for our previously developed angiogenesis signature [39]. (c) Consistently positive and negatively ranking miRNA coefficients, identified as statistically significant by the rank product statistic, are taken as the positive and negative hallmark-associated miRNA for each hallmark signature. (d) Network ‘map’ of signatures (coloured nodes) and their positively associated miRNA (grey nodes), connected by edges when an association was found, highlighting strong interconnectivity between distinct molecular signatures.

222 **Multiple members of the same miRNA family**  
 223 **display opposite tumour suppressor and onco-**  
 224 **genic behaviour**

225 Subsets of miRNAs that typically share common,  
 226 evolutionarily-conserved sequences or functional  
 227 motifs in their sequences are grouped into fam-  
 228 ilies [28, 29]. Interestingly, grouping the miR-  
 229 NAs found to be significantly upregulated and sig-  
 230 nificantly downregulated in association with each  
 231 of the gene signatures considered reveals that a

number of miRNAs from the same families are  
 present in different sets. That is, as summarised  
 in Supplementary Section S6, many of the same  
 miRNA families contain a significant number of  
 miRNAs, some of which are positively and others  
 negatively associated across gene signatures for the  
 hallmarks of cancer. In particular, the miR-17/17-  
 5p/20ab/20b-5p/93/106ab/427/518a-3p/519 and let-  
 7/98/4458/4500 families have multiple members  
 across signatures both in statistically significant pos-  
 itive and negative associations. This highlights once



243 more the context-dependent nature of miRNA regula- 287  
244 tion, and the potentially antagonistic behaviours 288  
245 of miRNAs when grouped by family, supporting 289  
246 previous findings. Here, we argue that such a group- 290  
247 ing does not necessarily reflect conserved function 291  
248 in the different tumour tissues, and we highlight that 292  
249 an additional context-dependent functional miRNA 293  
250 classification uncovering key functional associations 294  
251 is desirable. 295

## 252 **Hallmarks-associated miRNA targets are sig-** 287 253 **nificantly enriched for tumour suppressor** 288 254 **genes** 289

255 Starting from a list of positively associated miRNA 290  
256 with each gene signature, we aimed to identify which 291  
257 predicted miRNA-target pairs showed strong evi- 292  
258 dence of negative regulation across cancer types. The 293  
259 union of five miRNA target prediction algorithms, 294  
260 as implemented by the Bioconductor package miR- 295  
261 NAtap was used [45], with a minimum number of 296  
262 two sources required to be included in the analysis 297  
263 (see Methods). We considered only the miRNA and 298  
264 predicted target mRNA pairs for which there was 299  
265 a statistically significant negative Spearman corre- 300  
266 lation of expression across at least 5 cancer types, 301  
267 and used a rank-product test to identify the miRNA- 302  
268 target pairs showing consistency across cancer types 303  
269 (Figure 2a). As depicted by the process in Figure 2b-  
270 c, analysis of these significant miRNA-target pairs  
271 revealed a strong enrichment for tumour suppressor  
272 genes (as defined by the COSMIC database list of  
273 141 TSG), as might be expected for miRNA asso-  
274 ciated with oncogenic processes ( $p = 0.0006$ , two-  
275 sided Fisher's exact test). This suggests that miRNA-  
276 mediated suppression of tumour suppressor genes  
277 may be relatively common, significant, and associ-  
278 ated with the phenotypic hallmarks of cancer.

279 A different picture emerged upon repeating this  
280 analysis for oncogenes, and for the miRNAs found  
281 to be significantly negatively associated with one  
282 or more hallmark signature. We identified 1283 sig-  
283 nificantly anti-correlated miRNA-target pairs for  
284 these downregulated hallmark-associated miRNAs.  
285 Likewise, analysing all predicted miRNA-oncogene  
286 interactions among the 231 COSMIC oncogenes,

there were only 2 showing significant anticorrela- 287  
tion across tumour types with their predicted target 288  
miRNA (ESR1 and ABL2). Taking the intersection 289  
of these lists of 2 COSMIC oncogenes and the 1283 290  
miRNA-oncogene pairs associated with gene signa- 291  
tures identified only ESR1 (interacting with miR-18a- 292  
5p and miR-130b-3p) in common ( $p = 1.2 \cdot 10^{-5}$ , 293  
Fisher's exact test). This suggests that ESR1, estro- 294  
gen receptor alpha, may play a significant role across 295  
the hallmarks of cancer, and de-repression by reduc- 296  
tion of its miRNA-mediated repression may play 297  
a role in cancer phenotype, and ultimately, onco- 298  
genesis [35, 52]. On the other hand, this result is 299  
also a strong negative control for our analysis, and it 300  
concurrs in supporting the common oncogenic role 301  
of miRNAs via co-ordinated repression of tumour 302  
suppressor genes. 303

## 304 **A core set of tumour suppressor genes are** 304 305 **associated with the hallmark gene signatures** 305 306 **across cancer types** 306

307 Next, we asked whether our results could be bi- 307  
308 ased by the initial selection of miRNA, namely the 308  
309 ones associated with the cancer hallmarks. To an- 309  
310 swer this, we conducted a complementary analy- 310  
311 sis, namely we sought to determine which of the 311  
312 miRNA-mediated tumour suppressor genes showed 312  
313 significance in downregulation, in the context of 313  
314 all other tumour suppressor genes. Thus, we re- 314  
315 peated the previous analysis extended to all predicted 315  
316 miRNA-TSG pairs, considering again the significant 316  
317 associations across at least 5 cancer types, and then 317  
318 collated with a rank product test, as summarised by 318  
319 Figure 2d. Considering the miRNA-TSG pairs found 319  
320 to be of significance in both analyses from Figures 2c 320  
321 and d, we identified a set of 22 miRNA-TSG pairs, 321  
322 comprising 8 TSG (FAT4, TGFBR2, ARHGEF12, 322  
323 DNMT3A, CDK12, ACVR2A, SFRP4, and PTEN) 323  
324 and 17 miRNAs in Figure 2e, in common. We show 324  
325 also that the miRNA found to be associated to each 325  
326 of these TSG are, in many cancer types, expressed 326  
327 at significantly higher levels in wildtype cases for 327  
328 the associated TSG, across multiple tumour types 328  
329 (Supplementary Figure ??, Section S7). These re- 329  
330 sults show that for these tumour suppressor genes, i) 330

331 miRNA-TSG interactions show significance across  
332 cancer types, and more so than all other TSG con-  
333 sidered, ii) miRNA-TSG interactions show strong  
334 associations with the phenotypic hallmarks of cancer,  
335 and iii) miRNA-TSG interactions may show  
336 increased importance in cases with wild-type TSG.  
337 Importantly, the conserved miRNA-TSG regulation  
338 across cancer types reveals this as a potential new  
339 common epigenetic mechanism, alternative to ge-  
340 netic mutations, to achieve functional inhibition of  
341 TSGs in cancer.

### 342 **The action of hallmarks-associated miRNAs** 343 **shows cancer context-dependency**

344 The presented analysis highlights the action of  
345 miRNA in cancer. However, to further understand  
346 if this was cancer-specific, we sought to determine  
347 whether similar conclusions could be reached when  
348 analysing non-tumour tissues. Starting from the as-  
349 sociated adjacent normal tissue datasets from TCGA  
350 for tissue types with at least 20 samples for both  
351 miRNA and mRNA expression (BRCA, UCEC,  
352 HNSC, KIRC, LUAD, and BLCA), we fitted a linear  
353 model for gene signature score as a function of  
354 all miRNA, for each signature, in each of the 6 tissue  
355 types. Aggregating coefficients across tissue types,  
356 we found that while a highly significant number of  
357 miRNA associated with the gene signature scores  
358 across tissue types are the same as uncovered for  
359 the cancer tissues, there are significant differences.  
360 Across signatures, an overlap of on average 54% was  
361 observed for signature-associated miRNA, showing  
362 high statistical significance for miRNA positively  
363 and negatively associated with signatures ( $p < 10^{-19}$   
364 in all cases, by Fisher's exact test).

365 Examining the targets of these positively  
366 signature-associated miRNA from normal tissues,  
367 we identified 233 recurrently negatively correlated  
368 miRNA-target pairs, of which two contain miRNA-  
369 TSG pairs (CEBPA and NCOA4). However, this  
370 overlap of the 142 unique genes among the 233  
371 miRNA-target pairs with the 141 COSMIC tumour  
372 suppressor genes does not show significance, and  
373 may be due to chance alone ( $p = 0.26$  by Fisher's  
374 exact test). Thus, while the biology captured by

the phenotypes of the gene signatures may be con- 375  
sistent, more than chance alone would predict, be- 376  
tween tumour and normal samples, the resultant 377  
miRNA-target interactions are significantly differ- 378  
ent, and miRNA-TSG enrichment is not retained 379  
among normal tissue samples, highlighting the con- 380  
text dependency of these associations. 381

### 382 **Analysis of modes of regulation confirms** 383 **that copy number and mutational status are** 384 **key determinants of TSG expression**

385 With a set of TSG purported to be significantly regu-  
386 lated by miRNA in relation to phenotype identified,  
387 we next sought to characterise the determinants of  
388 their expression. In particular, we consider an ap-  
389 proach integrating multiple lines of genomic infor-  
390 mation; namely, methylation status, copy number,  
391 miRNA expression, and mutational status (see Meth-  
392 ods), with the linear model depicted in Figure 3a.  
393 Notably, when considering the impact of miRNA in  
394 this model, we considered all reported miRNA to po-  
395 tentially discover novel miRNA-target interactions.  
396 We then fit this model with penalised linear regres-  
397 sion over the various cancer types, and then subse-  
398 quently aggregated coefficients by the rank product  
399 statistic to identify recurrently positive and nega-  
400 tive predictors across cancer types, for each of the  
401 8 tumour suppressor genes identified in Figure 2e.  
402 This analysis yields both expected results, such as the  
403 important positive predictive role of copy number  
404 for each of the tumour suppressor genes, as seen in  
405 the left panel of Figure 3b, and novel associations,  
406 such as the positive association of many miRNA,  
407 and some methylation probes with TSG expression  
408 in some cases. These miRNA may be co-expressed  
409 for a variety of reasons, such as competitive inter-  
410 actions, repression of repressors of the TSG, or a  
411 nearby genomic locus, though penalised regression  
412 minimises the effect of co-location because of the  
413 inclusion of copy number as a covariate.

414 Likewise, the identified modes of negative regula-  
415 tion give expected results, with non-sense mutations  
416 and frame shift deletions consistently negatively as-  
417 sociated with TSG mRNA expression. Further, be-  
418 cause this analysis was done with all miRNA, and

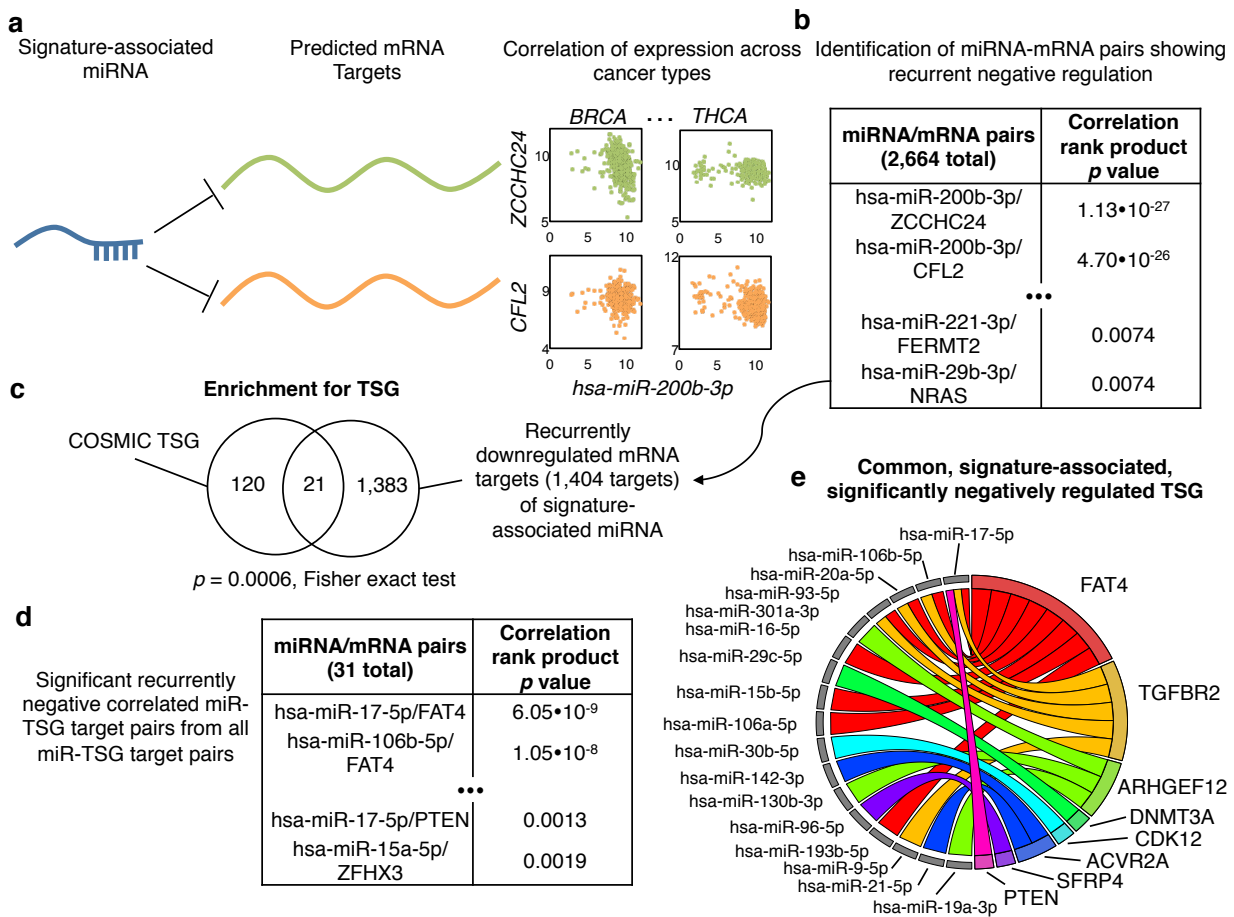

**Figure 2.** Approach used for interpreting miRNA-target interactions. (a) First, miRNA-target pairs for each positively associated hallmark-associated miRNA were identified, and the correlation between these was determined. (b) Next, the correlations across cancer types were aggregated, and those identified as consistently negative-ranking were identified with the rank product statistic. (c) Among this list of miRNA-mRNA target pairs, there was highly significant enrichment for tumour suppressor genes, as identified by the Fisher exact test. (d) The same procedure as described in (a) and (b) was repeated for all miRNA and all predicted target TSG pairs. (e) From the lists identified in (b) and (d), we identified those miRNA-TSG pairs in common, and plot their interactions on a circos plot, showing the repressive actions of each miRNA on its predicted target TSG.

419 not just those predicted to have a given TSG target,  
 420 these results may implicate novel miRNA-TSG inter-  
 421 actions. The complete rank product tables and  
 422 all autocorrelation matrices can be found in Supple-  
 423 mentary Section S8.

**PTEN, FAT4, and CDK12 tumour suppressor genes show exclusive regulation by either miRNA, promoter methylation or mutation across cancer types**

Once the modes of regulation and their relative importance was established (Figure 3), we sought to determine the relative occurrence of each of these modes of regulation. We identified which negative regulators co-occurred with each other as synergistic repressors, and conversely which were exclusive

434 repressors (Figure 4a). A cursory analysis of auto-  
435 correlation heatmaps (e.g. Figure 4a) revealed that  
436 in some cases, the regulation by miRNA appeared  
437 to be exclusive from the regulation by methylation  
438 probes. A full series of heatmaps for all cancer types  
439 considered and all tumour suppressor genes with  
440 their associated negative regulators identified is pre-  
441 sented in Supplementary Section S9, Figures ??- ??,  
442 and for an independent dataset in Figure ??, details  
443 described in Online Methods. These results suggest  
444 that TSG expression can be altered by either miRNA  
445 or methylation, in addition to deletion or mutation,  
446 in a ‘BRCA-ness’-like phenomenon [43]. To charac-  
447 terise this, we devised a bootstrap resampling based  
448 approach (see Online Methods), to determine signif-  
449 icance of the difference in co-correlation between  
450 the miRNA and the methylation probes themselves,  
451 and then with each other. For each cancer type, we  
452 calculated the significance value of this proportion  
453 (Figure 4b), and from this analysis, it arose imme-  
454 diately that for each of the TSG considered, there  
455 are tumour types in which the regulation is consis-  
456 tently exclusive. Further, it also arose that across  
457 multiple cancer types, three key tumour suppressor  
458 genes, PTEN, FAT4, and CDK12, consistently tend  
459 towards exclusivity in their regulation, lending sup-  
460 port for the importance of miRNA-based regulation  
461 of these genes. We further use the identified nega-  
462 tively associated miRNA and methylation probes,  
463 along with mutation status, to define subgroups of  
464 samples, for which we show decreased TSG expres-  
465 sion in the subgroups with high expression of these  
466 miRNA or high methylation of these probes, in Fig-  
467 ures ??- ?? in Supplementary section S10. Further,  
468 we show that the miRNA-high and highly methyl-  
469 ated samples have transcriptomes altered in a similar  
470 manner as in TSG mutated cases, via an analysis of  
471 differentially expressed genes in both cases, with sig-  
472 nificantly positively associated fold changes across  
473 cases, in Figures ??- ?? in Supplementary Section S10.

## 474 ARHGEF12, SFRP4, TGFBR2, and their 475 cognate miRNAs, are consistently associated 476 with breast cancer molecular subtype

477 Next, we sought to identify associations with tu-  
478 mour molecular subtypes, and as an initial analy-  
479 sis chose the molecular subtypes of breast cancer,  
480 owing to both the well-defined subtypes and the  
481 relatively large number of cases available for each  
482 subtype. An analysis of the eight identified tumour  
483 suppressor genes consistently negatively downregu-  
484 lated by miRNA across cancer types shows that in  
485 many cases, their mRNA levels are inversely associ-  
486 ated with breast cancer molecular subtype. In par-  
487 ticular, the basal subtype shows the lowest median  
488 expression of ARHGEF12, SFRP4, and TGFBR2, as  
489 compared to normal tissue, luminal A, B, Her2 am-  
490 plified, or normal subtypes of breast cancer as shown  
491 in Supplementary Figure ?? in Section S11, and this  
492 association is retained when cases are restricted to  
493 wildtype expression of ARHGEF12, SFRP4, and  
494 TGFBR2. At the level of the associated miRNA iden-  
495 tified as negative regulators of these TSG, we show  
496 that the median expression of these miRNA is also  
497 significantly associated with breast cancer molecular  
498 subtype, and inversely related to TSG mRNA expres-  
499 sion by subtype. We have also shown that these asso-  
500 ciations are preserved when samples with non-silent  
501 mutations in the TSG are removed. For further vali-  
502 dation, we also show reproducibility of these TSG  
503 and miRNA associations to breast cancer subtype in  
504 the independent Metabric dataset ( $N = 1293$ ) [13].

## 505 Discussion

506 In this work we have carried out a comprehensive  
507 and rigorous association analysis of human transcrip-  
508 tomic and genomic data to leverage an understanding  
509 of the role of miRNA in regulating complex pheno-  
510 types, through the lens of established gene expression  
511 signatures. Gene signatures represent transcriptomic  
512 association and we utilised them in two key ways,  
513 adding significant power to the analysis. Firstly, we  
514 use gene signatures to understand the relationship be-  
515 tween non-coding RNA and phenotype; this exploits  
516 the phenotypic associations intrinsic to established



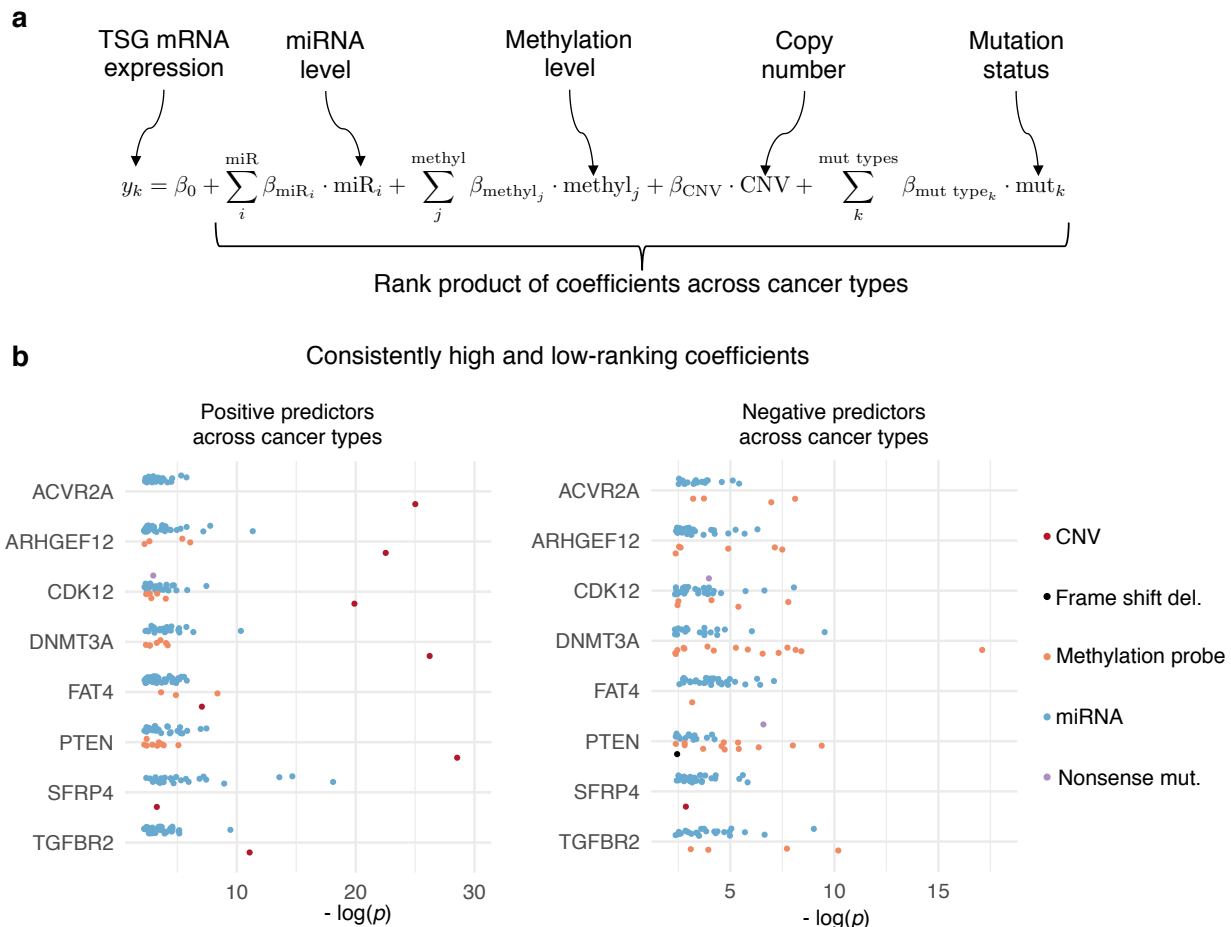

**Figure 3.** Approach used in determining the regulation of each TSG identified as potentially significantly miRNA-regulated. (a) The linear model used whilst determining predictors of TSG mRNA expression. (b) Model coefficients were aggregated across cancer types with the rank product statistic, and those identified as statistically significant positive and negative predictors are depicted alongside the  $-\log$  of their rank product p-value.

517 gene signatures. Secondly, because miRNA can only  
518 repress mRNA that are present in sufficient quantity  
519 in a cell, when inferring function, it is vital to ‘group’  
520 transcriptomic profiles by miRNA targeted gene  
521 expression. This allows for an understanding of the  
522 miRNA-mediated gene regulation important to the  
523 phenotype one wishes to uncover. Thus, this analysis  
524 represents a novel and powerful assessment of  
525 the complexity of miRNA regulation of phenotypes,  
526 particularly in the context of cancer.

527 Our work begins with ensuring applicability of  
528 the gene signatures, and then for each signature, we  
529 gain an understanding of the miRNA both signifi-

cantly up- and down-regulated in association with  
530 the signature score. From this, we obtain the net-  
531 work shown in Figure 1, which describes for the  
532 first time in a detailed fashion, and across cancer  
533 types, the contribution of individual miRNA to the  
534 complex cancer phenotype. We also show repro-  
535 ducibility of this network in an independent dataset,  
536 by considering the overlap with the network recon-  
537 structed using the Metabric dataset and the same gene  
538 signatures. Moreover, repeating this analysis, group-  
539 ing the miRNA significantly upregulated and down-  
540 regulated by miRNA family, illustrates that many  
541 miRNA families participate with members antago-  
542

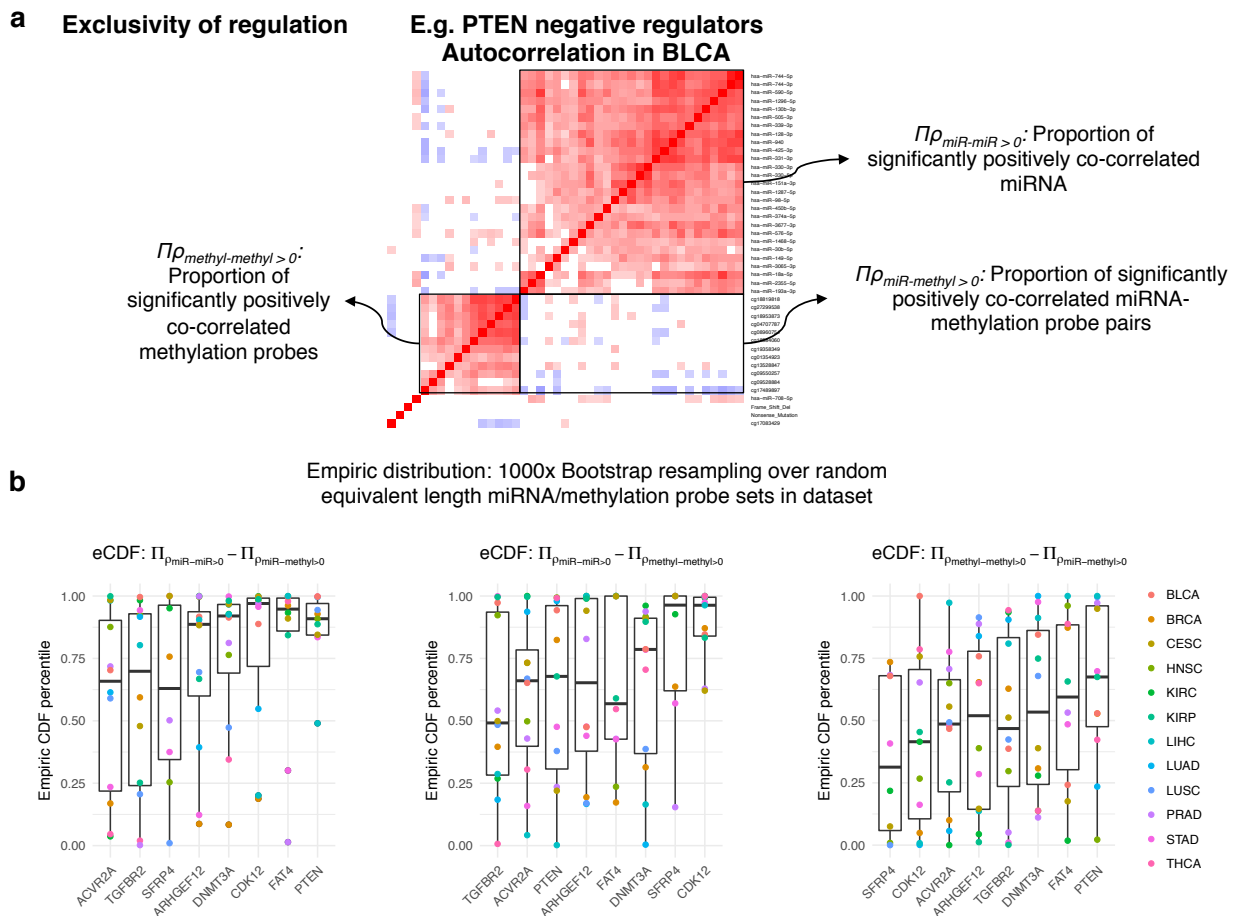

**Figure 4.** The approach used to determine the exclusivity of each mode of gene regulation on expression for the TSG considered. (a) Depiction of the autocorrelation heatmap for the expression of the various negative regulators of the tumour suppressor gene, and the variables considered and their meaning, as depicted. (b) Plots depicting the spread of the percentiles on the empiric CDF for the distributions for the pairwise differences of the variables identified in (a) through a bootstrapping-based analysis, as described in the Methods section.

543 nistically across the hallmarks of cancer; including 4  
 544 of the top 5 most common miRNA families identi-  
 545 fied by our analysis (miR-25 family, miR-17 family,  
 546 miR-15abc family, and let-7 family). This challenges  
 547 the biological hypothesis of miRNA families acting  
 548 in a generally coordinated fashion across multiple  
 549 phenotypic states, and highlights the context depen-  
 550 dent behaviour of individual miRNA themselves,  
 551 regardless of grouping by family [20,28,29]. Further  
 552 strengthening the argument for context-dependent  
 553 actions of miRNA is the observation that we have  
 554 made for the gene signature network reconstructed

from 6 tissue types with samples of adjacent normal, 555  
 non-tumour tissue. While a significant proportion 556  
 (54%) of miRNA found to be associated with the 557  
 gene signatures are the same as for the tumour tissues, 558  
 the analysis of the targets of these miRNA reveals 559  
 that they do not show enrichment for TSG in their 560  
 targets, despite being concordant to the findings in 561  
 tumour tissue, again highlighting the context depen- 562  
 dency in miRNA-mediated gene regulation. 563

As might be expected, given the complexity of 564  
 the action of non-coding RNA, we show in this 565  
 work that for a given phenotype, single miRNA- 566

567 target interactions do not account for the observed  
568 behaviour; rather it is subtle changes by a network of  
569 miRNAs, interacting with a set of targets in a coordi-  
570 nated manner, that serve to tune the transcriptome  
571 to achieve the complex phenotype. That is, because  
572 the targets of a given miRNA are predicted to be vari-  
573 able in their function, and are not all present in ev-  
574 ery sample at ‘repressable’ concentrations, the same  
575 miRNA can be associated with opposing phenotypic  
576 effects in different contexts, as reported by Denzler  
577 et al. in [14] for competing endogenous RNA. We  
578 show that the behaviour of miRNA is highly context  
579 dependent, and through the pan-cancer analysis, we  
580 have aimed to reduce the complexity of this context  
581 dependency by only selecting those interactions sig-  
582 nificantly occurring across cancer types. However,  
583 we caution that because miRNA are so context de-  
584 pendent, sample purity arises as an important issue  
585 in identifying pan-cancer miRNA signals. Further  
586 study into deconvolution methodologies enabling  
587 more accurate quantification of miRNA abundance  
588 from purely tumour samples will likely elucidate a  
589 clearer picture of miRNA-target interactions.

590 As miRNA are increasingly also thought of as  
591 potential therapeutic agents, because miRNA effects  
592 are highly context dependent and miRNA act in co-  
593 ordinated networks, if miRNA are to have effective  
594 therapeutic function, a single miRNA may be an  
595 ineffective strategy. Rather, we pose that a cocktail  
596 of miRNA will be necessary to sufficiently modify  
597 the tune of the symphony playing within the cancer  
598 cell, perhaps explaining poor therapeutic efficacy  
599 with current single miRNA-based therapeutics. For  
600 miRNA therapeutics to achieve function, we pose  
601 that these will likely have to be based on a number  
602 of miRNA, given to a highly selected group of pa-  
603 tients with transcriptomes deemed to be responsive  
604 to this network perturbation, and that in patients  
605 without these profiles, such a cocktail would require  
606 modification in order to be effective. Further, by  
607 using more than a single miRNA as a therapeutic  
608 agent, the off-target effects that have significantly  
609 limited development in this field may be mitigated,  
610 by buffering for this with other miRNA in off-target  
611 tissues [1].

612 In this work we further the knowledge of which

613 miRNA are involved in creating the phenotypes  
614 of cancer, across tissue types, to identify miRNA-  
615 TSG targets showing exclusive miRNA-mediated  
616 suppression. This suggests that a phenomenon simi-  
617 lar to that of the previously described ‘BRCA-ness,’  
618 wherein a miRNA, miR-182, has been shown to  
619 repress BRCA and confer sensitivity to PARP in-  
620 hibitors in a subset of tumours [43], may be at work  
621 within many cases, and across multiple tumour sup-  
622 pressor genes. Additionally, recent work has shown  
623 how ‘epimutations’ may result in aberrantly methyl-  
624 ated sites that can recapitulate the phenotype of a  
625 mutated tumour suppressor such as DNMT3A in  
626 leukaemia [27]. This raises the suggestion that there  
627 are tumour suppressor genes for which a mutation  
628 is not requisite for inactivation, but rather, inactiva-  
629 tion is achieved through miRNA-mediated repres-  
630 sion or methylation-mediated repression alone. For  
631 the TSG we have identified, we have also shown (see  
632 Online Materials), that the TSG mutations are oc-  
633 ccurring independently of MYC amplification status,  
634 which has been recently identified as an independent  
635 regulator of miRNAs. In addition, we show that  
636 such MYC amplification status is indeed associated  
637 with miRNA expression for the miRNA found to  
638 be negatively associated with each of the TSG in  
639 a majority of cases (Supplementary Figure ??, Sec-  
640 tion S12). Further, we have shown that in partic-  
641 ular tumours, for PTEN, CDK12, and FAT4, this  
642 miRNA or methylation-based suppression happens  
643 independently of other gene regulatory factors, such  
644 as mutations and copy number changes.

645 Lastly, we show how using generally validated,  
646 and specifically quality-controlled, gene signatures  
647 describing biologically conserved phenotypes can be  
648 used to collate large datasets to derive inference about  
649 miRNAs, a species whose signal has been tradition-  
650 ally hard to detect. The ability of this approach to  
651 capture tumour biology is highlighted through the  
652 identification of tumour suppressor genes showing  
653 miRNA-mediated regulation across tumour types,  
654 which we have shown have a very strong association  
655 to breast cancer molecular subtype. Specifically, this  
656 analysis points towards the role of decreased mRNA  
657 levels of ARHGEF12, SFRP4, and TGFBR2 in asso-  
658 ciation with the poor-prognosis basal breast cancer

659 subtype [2, 51]. Having identified potential nega- 701  
660 tive regulators of these TSG, we show how these 702  
661 miRNA alone associate with breast cancer subtype, 703  
662 elevated in the basal subtype, capturing potentially 704  
663 novel biological association. 705

664 Finally, the presented methodology may be used 706  
665 in future work encompassing both more specific sig- 707  
666 natures, as well as larger, more expansive datasets 708  
667 to derive even greater confidence in particular asso- 709  
668 ciations. This approach will enable the functional 710  
669 annotation of a greater variety of miRNAs, illumi- 711  
670 nating their critical role in post-transcriptional gene 712  
671 regulation. 713

## 672 Online Methods

### 673 Gene signatures considered

674 We consider a wide variety of gene signatures, touch- 714  
675 ing upon many of the hallmarks of cancer, as de- 715  
676 scribed in the original and updated work by Hana- 716  
677 han and Weinberg [24, 25]. Signatures were selected 717  
678 through a review of MSigDB hallmarks signatures, as 718  
679 well as through a review of the literature, and those 719  
680 used are summarised in Table 3 [34]. We note that 720  
681 while many of these signatures were derived for a 721  
682 particular tumour type, we have applied them across 722  
683 many different tumour types, but before doing so, 723  
684 we have performed an evaluation step (*sigQC*) to 724  
685 ensure that each signature used is applicable to ev- 725  
686 ery dataset under consideration, in Supplementary 726  
687 section S1, Figures ??- ??.

### 688 Datasets considered

689 In selecting datasets for this analysis, we initially 728  
690 aimed to select those comprising a comprehensive 729  
691 set of cancer types, with each type represented by 730  
692 a sufficient number of clinical samples, so as to re- 731  
693 duce the effects of noise. Thus, we initially began 732  
694 with a consideration of all cancer types represented 733  
695 within the Cancer Genome Atlas datasets (TCGA), 734  
696 and limited based on origin of neoplasm and num- 735  
697 ber of patients for whom miRNA-sequencing was 736  
698 carried out [55]. The RSEM normalised gene ex- 737  
699 pression, mature miRNA normalised expression 738  
700 data, copy number, mutation, and methylation 739  
701

702 data were accessed from the Firebrowse database at 703  
704 <http://www.firebrowse.org>. In particular, we con- 705  
706 sidered all cancer types which were epithelial or gland- 707  
708 ular with respect to histology, and with at least 200 708  
709 samples with miRNA-sequencing data. These two 709  
710 filters limit the cancers considered to a total of 15 710  
711 epithelial or glandular neoplasms, comprising a wide 711  
712 variety of cancer types, enabling the strong detec- 712  
713 tion of fundamental biology. Furthermore, among 713  
714 these tumour types, there are 7,738 clinical samples, 714  
715 for which 7,316 have miRNA-sequencing data. The 715  
716 tumour types, along with their sample counts are 716  
717 presented in Table 1. Details of the number of sam- 717  
718 ples included for each data type are presented in 718  
719 Table 2, and we note that for any analysis presented, 719  
720 any dataset present with fewer than 9 samples was 720  
721 excluded from analysis. This restriction excluded the 721  
722 analysis of COAD, OV, and UCEC datasets from 722  
723 the analysis of tumour suppressor genes, oncogenes, 723  
724 and exclusivity of regulation. 724

### 721 miRNA family database

722 miRNA ranked across different cancer types were 722  
723 further grouped together by microRNA family, as 723  
724 defined by the targetscan database, implemented in 724  
725 R as the targetscan.Hs.eg.db package [12, 33]. 725

### 726 Statistical methodology

#### 727 Transcriptomic data

728 Data were taken from the GDAC Firebrowse TCGA 728  
729 portal provided by the Broad Institute. miRNA 729  
730 datasets used were log<sub>2</sub> normalised mature miRNA 730  
731 counts for all cancer types. mRNA datasets used 731  
732 were normalised RSEM genes taken from data 732  
733 through the Illumina HiSeq RNAseq v2 platform. 733  
734 These expression data were then transformed by the 734  
735 transformation  $\log_2(x + 1)$ , for  $x$  as the original ex- 735  
736 pression value, and this was used in all further com- 736  
737 putation for all cancer types and signatures. Where 737  
738 not otherwise specified, signature scores are taken 738  
739 as the median of log<sub>2</sub>-transformed expression of all 739  
740 signature genes for each sample. Metabric datasets 740  
741 for normalised miRNA and mRNA expression 741  
742 were taken from the European Genome-Phenome 742



**Table 1. TCGA datasets considered and associated total clinical sample counts.**

| Dataset                                                          | Abbreviation | Clinical samples |
|------------------------------------------------------------------|--------------|------------------|
| Breast invasive carcinoma                                        | BRCA         | 1098             |
| Ovarian serous cystadenocarcinoma                                | OV           | 602              |
| Lung adenocarcinoma                                              | LUAD         | 585              |
| Uterine corpus endometrial carcinoma                             | UCEC         | 560              |
| Kidney renal clear cell carcinoma                                | KIRC         | 537              |
| Head and neck squamous cell carcinoma                            | HNSC         | 528              |
| Lung squamous cell carcinoma                                     | LUSC         | 504              |
| Thyroid carcinoma                                                | THCA         | 503              |
| Prostate adenocarcinoma                                          | PRAD         | 499              |
| Colon adenocarcinoma                                             | COAD         | 460              |
| Stomach adenocarcinoma                                           | STAD         | 443              |
| Bladder urothelial carcinoma                                     | BLCA         | 412              |
| Liver hepatocellular carcinoma                                   | LIHC         | 377              |
| Kidney renal papillary cell carcinoma                            | KIRP         | 323              |
| Cervical squamous cell carcinoma and endocervical adenocarcinoma | CESC         | 307              |

743 Archive (EGA) under study accession numbers  
744 EGAD00010000434 and EGAD00010000438.

#### 745 **Penalised linear regression**

746 The aim of the penalised linear regression method-  
747 ology was to determine those miRNA which most  
748 strongly predict (positively or negatively), the gene  
749 expression summary score for each signature. With  
750 consideration of this, the linear regression was de-  
751 signed such that the model utilised the expression  
752 levels of each individual miRNA as a covariate, in  
753 order to predict the signature score, taken as the me-  
754 dian of the log-transformed expression levels of the  
755 signature genes. We note that in order to facilitate  
756 direct comparability between distinct signatures and  
757 cancer types, we first normalised both the scores and  
758 miRNA expression levels to a mean of zero and unit  
759 variance. This transformation ensures that the co-  
760 efficients and their relative values are comparable  
761 between cancer types and signatures.

762 We used a previously developed statistical ap-  
763 proach [6] using combined univariate-multivariate  
764 penalised linear regression, with 10-fold cross val-  
765 idation to infer significant relationships between  
766 miRNA and gene signatures without overfitting our  
767 model. That is, the data was partitioned into 10 com-

ponents, and on each component, a univariate model  
768 was first applied to select miRNA used for penalised  
769 multivariate linear regression. The penalised multi-  
770 variate linear model with the least predictive error  
771 was selected, and coefficients for these miRNA were  
772 used for further analysis. To further clarify, an ini-  
773 tial univariate filter was applied to remove miRNA  
774 showing little predictive power from the multivariate  
775 linear model, and only those miRNA with  $p < 0.2$   
776 significance in the univariate linear model predicting  
777 signature score were considered. This permissive p-  
778 value was used to assure that the multivariate linear  
779 model did not contain artificially stringent associa-  
780 tions, as the penalization procedure also functions as  
781 a stringency filter, reducing the false discovery rate.  
782

The multivariate linear regression was carried out  
783 as a penalised L1/L2 regression to reduce complicat-  
784 ing effects of co-correlated miRNAs as predictors  
785 of the signature scores. To tune the parameters for  
786 the combined L1/L2 regression, a range of values  
787 (0, 0.01, 0.1, 1, 10, 100), was tested for the L2 pa-  
788 rameter, while in each case the L1 parameter was  
789 optimised. Following computation of all models,  
790 the model with the greatest log-likelihood was cho-  
791 sen. All model-fitting was done with 10-fold cross-  
792 validation, and was carried out using the *penalized*  
793 package in R [21, 22].  
794

**Table 2. Counts of common samples with miRNA, mRNA, mutation, methylation, and copy number data.**

| Dataset | mRNA samples | miRNA | mRNA and miRNA | mRNA, miRNA, mutation, methylation, and copy number |
|---------|--------------|-------|----------------|-----------------------------------------------------|
| BRCA    | 782          | 755   | 499            | 324                                                 |
| OV      | 307          | 461   | 291            | 0                                                   |
| LUAD    | 517          | 452   | 449            | 181                                                 |
| UCEC    | 177          | 412   | 174            | 4                                                   |
| KIRC    | 534          | 255   | 255            | 121                                                 |
| HNSC    | 520          | 486   | 478            | 244                                                 |
| LUSC    | 501          | 342   | 342            | 51                                                  |
| THCA    | 501          | 502   | 500            | 396                                                 |
| PRAD    | 497          | 494   | 493            | 329                                                 |
| COAD    | 286          | 221   | 221            | 0                                                   |
| STAD    | 415          | 389   | 370            | 230                                                 |
| BLCA    | 408          | 409   | 405            | 128                                                 |
| LIHC    | 373          | 374   | 369            | 186                                                 |
| KIRP    | 291          | 292   | 291            | 148                                                 |
| CESC    | 304          | 307   | 304            | 190                                                 |

### 795 Rank product analysis

796 Once coefficients were obtained for the linear model  
 797 via the penalised regression approach described ear-  
 798 lier, these were collated into matrices with columns  
 799 defined by cancer type, for each of the gene sig-  
 800 natures considered. These coefficients were then  
 801 fractionally-ranked both from most negative to most  
 802 positive, and most positive to most negative in value.  
 803 The rank product statistic, as described by Breitling  
 804 et al., in 2004, for these fractional ranks was then con-  
 805 sidered, and the coefficients were ranked in terms  
 806 of their significance of rank product test statistic,  
 807 as implemented by the RankProd R package [4, 9].  
 808 This was used to give high-confidence rankings of  
 809 miRNA associated both positively and negatively  
 810 with the various signatures considered.

### 811 Validation of miRNA-signature interactions

812 In order to ensure reproducibility of the approach  
 813 used to identify gene signature-associated miRNA,  
 814 we repeated the linear modeling procedure across the  
 815 independent Metabric matched miRNA and mRNA  
 816 microarray dataset of 1293 samples [13]. We mapped

each gene signature to corresponding Ensembl IDs, 817  
 and repeated the combined univariate-multivariate 818  
 linear modeling approach over all miRNA probes. 819  
 The miRNA probes identified as positive and neg- 820  
 ative coefficients were then identified, and mapped 821  
 to their corresponding mature miRNA ID. The sta- 822  
 tistical significance of this overlap is shown in Sup- 823  
 plementary Figure ??, and was calculated using the 824  
 Fisher exact test. Nearly all signatures show strong 825  
 statistical significance, and in the majority of cases 826  
 not reaching statistical significance, signature appli- 827  
 cability to the Metabric dataset may present an issue, 828  
 as signatures contained a high proportion of genes 829  
 with low variance, which presents an issue for signa- 830  
 ture applicability, particularly for microarray-based 831  
 datasets. 832

### Target analysis 833

Targets were aggregated for each miRNA using the 834  
 miRNAtap database in R, as implemented through 835  
 the Bioconductor targetscan.Hs.eg.db package [46]. 836  
 The default settings of using all 5 possible target 837  
 databases: DIANA [37], Miranda [17], PicTar [32], 838  
 TargetScan [19], and miRDB [56], with a minimum 839

**Table 3. Gene signatures considered and associated hallmarks of cancer.**

| Signature name                                    | Reference                 | Number of genes | Associated hallmarks                                              |
|---------------------------------------------------|---------------------------|-----------------|-------------------------------------------------------------------|
| Epithelial Mesenchymal Transition, MSigDB         | MSigDB [34]               | 200             | Activating invasion and metastasis                                |
| Invasiveness                                      | Marsan et al., 2014 [38]  | 16              | Activating invasion and metastasis                                |
| Oxidative Phosphorylation, MSigDB                 | MSigDB [34]               | 200             | Deregulating cellular energetics                                  |
| Reactive Oxygen Species Pathway, MSigDB           | MSigDB [34]               | 49              | Deregulating cellular energetics                                  |
| G2M Checkpoint, MSigDB                            | MSigDB [34]               | 200             | Enabling replicative immortality                                  |
| PI3K-AKT-MTOR Signaling, MSigDB                   | MSigDB [34]               | 105             | Evading growth suppressors                                        |
| Xenobiotic Metabolism, MSigDB                     | MSigDB [34]               | 200             | Evading growth suppressors                                        |
| DNA Repair, MSigDB                                | MSigDB [34]               | 150             | Genome instability and mutation, Enabling replicative immortality |
| p53 Pathway, MSigDB                               | MSigDB [34]               | 200             | Genome instability and mutation, Enabling replicative immortality |
| Hypoxia                                           | Buffa et al., 2010 [5]    | 51              | Inducing angiogenesis                                             |
| Angiogenesis, MSigDB                              | MSigDB [34]               | 36              | Inducing angiogenesis                                             |
| Hypoxia, MSigDB                                   | MSigDB [34]               | 200             | Inducing angiogenesis                                             |
| Angiogenesis, upregulated                         | Desmedt et al., 2008 [15] | 5               | Inducing angiogenesis                                             |
| Angiogenesis                                      | Masiero et al., 2013 [39] | 43              | Inducing angiogenesis                                             |
| Proliferation, upregulated                        | Desmedt et al., 2008 [15] | 140             | Sustaining proliferative signaling                                |
| KRAS Signaling, Up, MSigDB                        | MSigDB [34]               | 200             | Sustaining proliferative signaling                                |
| Inflammatory Response, MSigDB                     | MSigDB [34]               | 200             | Tumour-promoting inflammation, Avoiding immune destruction        |
| IL2-STAT5 Signaling, MSigDB                       | MSigDB [34]               | 200             | Tumour-promoting inflammation, Avoiding immune destruction        |
| IL6-JAK-STAT3 Signaling, MSigDB                   | MSigDB [34]               | 87              | Tumour-promoting inflammation, Avoiding immune destruction        |
| TGF $\beta$ Signaling, MSigDB                     | MSigDB [34]               | 54              | Tumour-promoting inflammation, Avoiding immune destruction        |
| TNF $\alpha$ Signaling via NF- $\kappa$ B, MSigDB | MSigDB [34]               | 200             | Tumour-promoting inflammation, Avoiding immune destruction        |
| Immune Invasion, upregulated                      | Desmedt et al., 2008 [15] | 92              | Tumour-promoting inflammation, Avoiding immune destruction        |

840 source number of 2 were used, and the union of all  
841 targets found was taken as the set of targets for a  
842 given miRNA.

843 For each of these target-miRNA pairs, the Spear-  
844 man correlation coefficient was calculated across ev-  
845 ery cancer type for miRNA versus target mRNA  
846 expression, partial to mutation status of the mRNA,  
847 and if this value reached statistical significance of  
848  $p < 0.05$ , it was recorded, and otherwise was  
849 recorded as 0. Note that mutational status was re-  
850 ported as a binary variable with a value of 1 for any  
851 non-silent, non-intronic mutation, and 0 otherwise.  
852 The target-miRNA pairs with at least 5 non-zero

853 entries across cancer types were kept for further anal-  
854 ysis, and subsequently were analysed using the rank  
855 product statistic, to identify those pairs with con-  
856 sistent negative correlations, across cancer types,  
857 with respect to all other hallmarks-miRNA pairs.  
858 Partial correlations were done in R using the ppcor  
859 package [30].

860 Furthermore, in the global analysis of all TSG-  
861 miRNA pairs, we considered every TSG-miRNA  
862 predicted target pair, and again considered the Spear-  
863 man correlation partial to mutation status, collaps-  
864 ing the value to 0 if significance  $p < 0.05$ . The rank  
865 product statistic was again considered on those pairs

866 with at least 5 non-zero values across cancer types,  
867 thereby identifying those TSG-miRNA pairs con-  
868 sistently negatively correlated across cancer types,  
869 significantly with respect to all other TSG. Lists  
870 of known oncogenes and tumour suppressor genes  
871 were taken from the COSMIC database [18]. Be-  
872 cause MYC amplification is a possible confounder to  
873 the miRNA identified as associated with TSG across  
874 cancer types, we checked to ensure that mutation  
875 of the 8 TSG identified, across cancer types, does  
876 not co-occur significantly with MYC amplification.  
877 Of the 96 TSG-cancer type pairs (8 TSG over 12  
878 cancer types), none showed significance in the over-  
879 enrichment by a one-sided Fisher exact test for MYC  
880 amplification and TSG mutation after correcting for  
881 multiple testing.

## 882 Analysis of TSG regulation

883 In analysing the regulation of the TSG identified as  
884 related to the hallmarks of cancer and potentially  
885 amenable to miRNA regulation, we first limited the  
886 samples under consideration to those where copy  
887 number data, gene expression data, miRNA expres-  
888 sion, mutation data, and methylation data were all  
889 present. Mutation data was again taken as a bi-  
890 nary variable, but as opposed to the partial correla-  
891 tion analysis, mutations were stratified into their re-  
892 ported types (e.g. missense mutations are all grouped  
893 together, etc.). That is, the missense mutation vari-  
894 able would only contain a value of 1 if the sample  
895 had a missense mutation in the gene of interest, and  
896 0 otherwise. All variables considered in the linear  
897 regression were standardised to a mean of 0, and a  
898 standard deviation of 1.

899 L1/2 penalty-based penalised linear regression  
900 was then performed, in the same manner as above,  
901 for the linear model described in Figure 3a. Sub-  
902 sequently, coefficients were aggregated across the  
903 various cancer types and after the rank product test  
904 was applied, those predictors showing statistically  
905 consistent positive or negative coefficients were iden-  
906 tified. Following this, the autocorrelation of each  
907 of these predictor variables was considered, for each  
908 of the TSG in each cancer type, as depicted by the  
909 heatmap in Figure 4a.

## Analysis of the exclusivity of gene regulation 910

To determine the exclusivity of gene regulation, we  
911 calculated the empiric distributions of the variables  
912  $\Pi_{\rho_k}$  as defined graphically in Figure 4. These repre-  
913 sent the proportion of miRNA-miRNA or miRNA-  
914 methylation or methylation probe-methylation  
915 probe pairs that show significant positive Spear-  
916 man co-correlation ( $p < 0.05$ ). For the bootstrapping  
917 analysis, we resampled the datasets, choosing  
918 miRNA and methylation probes in the same num-  
919 ber as the heatmap in question, and then considered  
920 the distributions of the pairwise differences in the  
921 variables  $\Pi_{\rho_k}$ . From these distributions for the pair-  
922 wise differences, we were able to infer the percentile  
923 on the empirically constructed CDF that the true  
924 case represented, the results of which are depicted in  
925 Figure 4b, showing, for each gene and cancer type,  
926 the percentile on the pairwise difference empiric  
927 distribution for the observed heatmap. 928

The calculations for the analysis of TSG regula-  
929 tion and analysis for the exclusivity of gene regula-  
930 tion were repeated for an independent dataset com-  
931 prising matched mRNA, miRNA, CNV, mutation,  
932 and methylation data for 93 patients with ovarian  
933 cancer, from the OV-AU project from the ICGC data  
934 portal [58]. Results of this analysis are highlighted  
935 in Supplementary Section S9, Figure ??.

## Acknowledgements 937

The authors are grateful for the financial support pro-  
938 vided by Cancer Research UK to FMB, ALH and  
939 AD, and the support provided by the Clarendon  
940 Fund to AD. ALH is grateful for the financial sup-  
941 port provided by the Breast Cancer Research Founda-  
942 tion. The authors thank Dr. Venkata Manem for  
943 helpful discussions. All authors are eternally grateful  
944 to the patients and their families who provided tissue  
945 to the Cancer Genome Atlas and Metabric projects. 946

## Author Contributions 947

FMB conceived the idea, designed and supervised  
948 the study. AD and FMB devised the analyses. AD  
949 wrote code and performed analyses. JGS, ALH and  
950



951 FMB supervised the implementation. AD wrote  
952 the manuscript with contribution from all other  
953 authors.

## 954 **Competing Financial Interests**

955 The authors declare no competing financial interests.

## 956 References

- 957 1. L. Aagaard and J. J. Rossi. Rnai therapeutics: principles, prospects and challenges. *Advanced drug*  
958 *delivery reviews*, 59(2):75–86, 2007.
- 959 2. F. Bertucci, P. Finetti, and D. Birnbaum. Basal breast cancer: a complex and deadly molecular  
960 subtype. *Current molecular medicine*, 12(1):96–110, 2012.
- 961 3. A. H. Bild, G. Yao, J. T. Chang, Q. Wang, A. Potti, D. Chasse, M.-B. Joshi, D. Harpole, J. M.  
962 Lancaster, A. Berchuck, et al. Oncogenic pathway signatures in human cancers as a guide to targeted  
963 therapies. *Nature*, 439(7074):353, 2006.
- 964 4. R. Breitling, P. Armengaud, A. Amtmann, and P. Herzyk. Rank products: a simple, yet powerful,  
965 new method to detect differentially regulated genes in replicated microarray experiments. *FEBS*  
966 *letters*, 573(1-3):83–92, 2004.
- 967 5. F. Buffa, A. Harris, C. West, and C. Miller. Large meta-analysis of multiple cancers reveals a  
968 common, compact and highly prognostic hypoxia metagene. *British journal of cancer*, 102(2):428,  
969 2010.
- 970 6. F. M. Buffa, C. Camps, L. Winchester, C. E. Snell, H. E. Gee, H. Sheldon, M. Taylor, A. L.  
971 Harris, and J. Ragoussis. microrna associated progression pathways and potential therapeutic targets  
972 identified by integrated mrna and microrna expression profiling in breast cancer. *Cancer research*,  
973 pages canres–0489, 2011.
- 974 7. G. A. Calin and C. M. Croce. Microrna signatures in human cancers. *Nature reviews. Cancer*,  
975 6(11):857, 2006.
- 976 8. C. Camps, F. M. Buffa, S. Colella, J. Moore, C. Sotiriou, H. Sheldon, A. L. Harris, J. M. Gleadle,  
977 and J. Ragoussis. hsa-mir-210 is induced by hypoxia and is an independent prognostic factor in  
978 breast cancer. *Clinical cancer research*, 14(5):1340–1348, 2008.
- 979 9. F. D. Carratore, A. J. F. H. <fxhong@jimmy.harvard.edu>, B. Wittner, R. Breitling, , and F. Battke.  
980 *RankProd: Rank Product method for identifying differentially expressed genes with application in meta-*  
981 *analysis*, 2016. R package version 3.0.0.
- 982 10. A. P. Carroll, P. A. Tooney, and M. J. Cairns. Context-specific microrna function in developmental  
983 complexity. *Journal of molecular cell biology*, 5(2):73–84, 2013.
- 984 11. Z. Chen, T.-C. Lai, Y.-H. Jan, F.-M. Lin, W.-C. Wang, H. Xiao, Y.-T. Wang, W. Sun, X. Cui, Y.-S.  
985 Li, et al. Hypoxia-responsive mirnas target argonaute 1 to promote angiogenesis. *The Journal of*  
986 *clinical investigation*, 123(3):1057, 2013.
- 987 12. G. Csardi. *targetsCan.Hs.eG.db: TargetScan miRNA target predictions for human*, 2013. R package  
988 version 0.6.1.
- 989 13. C. Curtis, S. P. Shah, S.-F. Chin, G. Turashvili, O. M. Rueda, M. J. Dunning, D. Speed, A. G. Lynch,  
990 S. Samarajiwa, Y. Yuan, et al. The genomic and transcriptomic architecture of 2,000 breast tumours  
991 reveals novel subgroups. *Nature*, 486(7403):346–352, 2012.

14. R. Denzler, S. E. McGeary, A. C. Title, V. Agarwal, D. P. Bartel, and M. Stoffel. Impact of microRNA levels, target-site complementarity, and cooperativity on competing endogenous rna-regulated gene expression. *Molecular cell*, 64(3):565–579, 2016. 992  
993  
994
15. C. Desmedt, B. Haibe-Kains, P. Wirapati, M. Buyse, D. Larsimont, G. Bontempi, M. Delorenzi, M. Piccart, and C. Sotiriou. Biological processes associated with breast cancer clinical outcome depend on the molecular subtypes. *Clinical cancer research*, 14(16):5158–5165, 2008. 995  
996  
997
16. A. Dhawan, A. Barberis, W.-C. Cheng, E. Domingo, C. West, T. Maughan, J. Scott, A. L. Harris, and F. M. Buffa. sigqc: A procedural approach for standardising the evaluation of gene signatures. *bioRxiv*, page 203729, 2017. 998  
999  
1000
17. A. J. Enright, B. John, U. Gaul, T. Tuschl, C. Sander, and D. S. Marks. MicroRNA targets in drosophila. *Genome biology*, 5(1):R1, 2003. 1001  
1002
18. S. A. Forbes, D. Beare, H. Boutselakis, S. Bamford, N. Bindal, J. Tate, C. G. Cole, S. Ward, E. Dawson, L. Ponting, et al. Cosmic: somatic cancer genetics at high-resolution. *Nucleic acids research*, 45(D1):D777–D783, 2016. 1003  
1004  
1005
19. R. C. Friedman, K. K.-H. Farh, C. B. Burge, and D. P. Bartel. Most mammalian mrnas are conserved targets of microRNAs. *Genome research*, 19(1):92–105, 2009. 1006  
1007
20. F.-B. Gao. Context-dependent functions of specific microRNAs in neuronal development. *Neural development*, 5(1):25, 2010. 1008  
1009
21. J. J. Goeman. L1 penalized estimation in the cox proportional hazards model. *Biometrical journal*, 52(1):70–84, 2010. 1010  
1011
22. J. J. Goeman. *Penalized R package, version 0.9-50*, 2017. R package. 1012
23. T. Gutschner and S. Diederichs. The hallmarks of cancer: a long non-coding rna point of view. *RNA biology*, 9(6):703–719, 2012. 1013  
1014
24. D. Hanahan and R. A. Weinberg. The hallmarks of cancer. *Cell*, 100(1):57–70, 2000. 1015
25. D. Hanahan and R. A. Weinberg. Hallmarks of cancer: the next generation. *Cell*, 144(5):646–674, 2011. 1016  
1017
26. J. Jones, H. Otu, D. Spentzos, S. Kolia, M. Inan, W. D. Beecken, C. Fellbaum, X. Gu, M. Joseph, A. J. Pantuck, et al. Gene signatures of progression and metastasis in renal cell cancer. *Clinical Cancer Research*, 11(16):5730–5739, 2005. 1018  
1019  
1020
27. E. Jost, Q. Lin, C. I. Weidner, S. Wilop, M. Hoffmann, T. Walenda, M. Schemionek, O. Herrmann, M. Zenke, T. Brümmendorf, et al. Epimutations mimic genomic mutations of dnmt3a in acute myeloid leukemia. *Leukemia*, 28(6):1227–1234, 2014. 1021  
1022  
1023
28. J. Juhila, T. Sipilä, K. Icaý, D. Nicorici, P. Ellonen, A. Kallio, E. Korpelainen, D. Greco, and I. Hovatta. MicroRNA expression profiling reveals mirna families regulating specific biological pathways in mouse frontal cortex and hippocampus. *PloS one*, 6(6):e21495, 2011. 1024  
1025  
1026
29. T. K. Kamanu, A. Radovanovic, J. A. Archer, and V. B. Bajic. Exploration of mirna families for hypotheses generation. *Scientific reports*, 3, 2013. 1027  
1028

- 1029 30. S. Kim. *ppcor: Partial and Semi-Partial (Part) Correlation*, 2015. R package version 1.1.
- 1030 31. R. Kulshreshtha, M. Ferracin, S. E. Wojcik, R. Garzon, H. Alder, F. J. Agosto-Perez, R. Davuluri,  
1031 C.-G. Liu, C. M. Croce, M. Negrini, et al. A microRNA signature of hypoxia. *Molecular and cellular*  
1032 *biology*, 27(5):1859–1867, 2007.
- 1033 32. S. Lall, D. Grün, A. Krek, K. Chen, Y.-L. Wang, C. N. Dewey, P. Sood, T. Colombo, N. Bray,  
1034 P. MacMenamin, et al. A genome-wide map of conserved microRNA targets in *c. elegans*. *Current*  
1035 *biology*, 16(5):460–471, 2006.
- 1036 33. B. P. Lewis, C. B. Burge, and D. P. Bartel. Conserved seed pairing, often flanked by adenosines,  
1037 indicates that thousands of human genes are microRNA targets. *cell*, 120(1):15–20, 2005.
- 1038 34. A. Liberzon, A. Subramanian, R. Pinchback, H. Thorvaldsdóttir, P. Tamayo, and J. P. Mesirov.  
1039 Molecular signatures database (msigdb) 3.0. *Bioinformatics*, 27(12):1739–1740, 2011.
- 1040 35. W.-H. Liu, S.-H. Yeh, C.-C. Lu, S.-L. Yu, H.-Y. Chen, C.-Y. Lin, D.-S. Chen, and P.-J. Chen.  
1041 MicroRNA-18a prevents estrogen receptor- $\alpha$  expression, promoting proliferation of hepatocellular  
1042 carcinoma cells. *Gastroenterology*, 136(2):683–693, 2009.
- 1043 36. L.-F. Lu, G. Gasteiger, I.-S. Yu, A. Chaudhry, J.-P. Hsin, Y. Lu, P. D. Bos, L.-L. Lin, C. L. Zawislak,  
1044 S. Cho, et al. A single mirna-mrna interaction affects the immune response in a context-and  
1045 cell-type-specific manner. *Immunity*, 43(1):52–64, 2015.
- 1046 37. M. Maragkakis, M. Reczko, V. A. Simossis, P. Alexiou, G. L. Papadopoulos, T. Dalamagas, G. Gi-  
1047 annopoulos, G. Goumas, E. Koukis, K. Kourtis, et al. Diana-microt web server: elucidating microRNA  
1048 functions through target prediction. *Nucleic acids research*, 37(suppl\_2):W273–W276, 2009.
- 1049 38. M. Marsan, G. Van den Eynden, R. Limame, P. Neven, J. Hauspy, P. A. Van Dam, I. Vergote,  
1050 L. Y. Dirix, P. B. Vermeulen, and S. J. Van Laere. A core invasiveness gene signature reflects  
1051 epithelial-to-mesenchymal transition but not metastatic potential in breast cancer cell lines and  
1052 tissue samples. *PLoS one*, 9(2):e89262, 2014.
- 1053 39. M. Masiero, F. C. Simões, H. D. Han, C. Snell, T. Peterkin, E. Bridges, L. S. Mangala, S. Y.-Y.  
1054 Wu, S. Pradeep, D. Li, et al. A core human primary tumor angiogenesis signature identifies the  
1055 endothelial orphan receptor eltd1 as a key regulator of angiogenesis. *Cancer cell*, 24(2):229–241,  
1056 2013.
- 1057 40. J. S. Mattick and I. V. Makunin. Non-coding rna. *Human molecular genetics*, 15(suppl\_1):R17–R29,  
1058 2006.
- 1059 41. S. Memczak, M. Jens, A. Elefsinioti, F. Torti, J. Krueger, A. Rybak, L. Maier, S. D. Mackowiak,  
1060 L. H. Gregersen, M. Munschauer, et al. Circular RNAs are a large class of animal RNAs with regulatory  
1061 potency. *Nature*, 495(7441):333, 2013.
- 1062 42. J. T. Mendell and E. N. Olson. MicroRNAs in stress signaling and human disease. *Cell*, 148(6):1172–  
1063 1187, 2012.
- 1064 43. P. Moskwa, F. M. Buffa, Y. Pan, R. Panchakshari, P. Gottipati, R. J. Muschel, J. Beech, R. Kulshreshtha,  
1065 K. Abdelmohsen, D. M. Weinstock, et al. mir-182-mediated downregulation of brca1 impacts dna  
1066 repair and sensitivity to parp inhibitors. *Molecular cell*, 41(2):210–220, 2011.



44. R. M. O'connell, D. S. Rao, A. A. Chaudhuri, and D. Baltimore. Physiological and pathological roles for microRNAs in the immune system. *Nature reviews. Immunology*, 10(2):111, 2010. 1067  
1068
45. M. Pajak and T. I. Simpson. mirnatap. db: microRNA targets-aggregated predictions database use. 1069  
2014. 1070
46. M. Pajak and T. I. Simpson. *miRNAAtap: miRNA Targets - Aggregated Predictions*, 1071  
2016. R package version 1.8.0. 1072
47. A. V. Roschke, O. K. Glebov, S. Lababidi, K. S. Gehlhaus, J. N. Weinstein, and I. R. Kirsch. Chromosomal instability is associated with higher expression of genes implicated in epithelial-mesenchymal transition, cancer invasiveness, and metastasis and with lower expression of genes involved in cell cycle checkpoints, dna repair, and chromatin maintenance. *Neoplasia*, 10(11):1222IN10–1230IN26, 1073  
2008. 1074  
1075  
1076  
1077
48. G. L. Semenza. Hif-1: mediator of physiological and pathophysiological responses to hypoxia. *Journal of applied physiology*, 88(4):1474–1480, 2000. 1078  
1079
49. S. K. Shenouda and S. K. Alahari. MicroRNA function in cancer: oncogene or a tumor suppressor? 1080  
*Cancer and Metastasis Reviews*, 28(3-4):369, 2009. 1081
50. E. M. Small and E. N. Olson. Pervasive roles of microRNAs in cardiovascular biology. *Nature*, 1082  
469(7330):336, 2011. 1083
51. T. Sørlie, C. M. Perou, R. Tibshirani, T. Aas, S. Geisler, H. Johnsen, T. Hastie, M. B. Eisen, M. Van De Rijn, S. S. Jeffrey, et al. Gene expression patterns of breast carcinomas distinguish tumor subclasses with clinical implications. *Proceedings of the National Academy of Sciences*, 98(19):10869–10869–10874, 2001. 1084  
1085  
1086  
1087
52. S. Tchatchou, A. Jung, K. Hemminki, C. Sutter, B. Wappenschmidt, P. Bugert, B. H. Weber, D. Niederacher, N. Arnold, R. Varon-Mateeva, et al. A variant affecting a putative mirna target site in estrogen receptor (esr) 1 is associated with breast cancer risk in premenopausal women. *Carcinogenesis*, 30(1):59–64, 2008. 1088  
1089  
1090  
1091
53. S. Tian, P. Roepman, L. J. Van't Veer, R. Bernards, F. De Snoo, and A. M. Glas. Biological functions of the genes in the mammaprint breast cancer profile reflect the hallmarks of cancer. *Biomarker insights*, 5:129, 2010. 1092  
1093  
1094
54. X. Wang, X. Zhang, X.-P. Ren, J. Chen, H. Liu, J. Yang, M. Medvedovic, Z. Hu, and G.-C. Fan. MicroRNA-494 targeting both pro-apoptotic and anti-apoptotic proteins protects against ischemia/reperfusion-induced cardiac injury. *Circulation*, 122(13):1308, 2010. 1095  
1096  
1097
55. J. N. Weinstein, E. A. Collisson, G. B. Mills, K. R. M. Shaw, B. A. Ozenberger, K. Ellrott, I. Shmulevich, C. Sander, J. M. Stuart, C. G. A. R. Network, et al. The cancer genome atlas pan-cancer analysis project. *Nature genetics*, 45(10):1113–1120, 2013. 1098  
1099  
1100
56. N. Wong and X. Wang. mirdb: an online resource for microRNA target prediction and functional annotations. *Nucleic acids research*, 43(D1):D146–D152, 2014. 1101  
1102
57. M. Yamakuchi, S. Yagi, T. Ito, and C. J. Lowenstein. MicroRNA-22 regulates hypoxia signaling in colon cancer cells. *PloS one*, 6(5):e20291, 2011. 1103  
1104

- 1105 58. J. Zhang, J. Baran, A. Cros, J. M. Guberman, S. Haider, J. Hsu, Y. Liang, E. Rivkin, J. Wang,  
1106 B. Whitty, et al. International cancer genome consortium data portal—a one-stop shop for cancer  
1107 genomics data. *Database*, 2011, 2011.
